# Supplementary material for: A cyano cobalt “electron transfer bridge” boosting the two-electron reaction of a MnO2 cathode with long lifespan in aqueous zinc batteries
Source: Royal Society of Chemistry journal article supplement (doi:10.1039/d3ee03711h), 2024-01-01
Supplement: d3ee03711h1.pdf [file d3ee03711h1.pdf]

Electronic Supplementary Information for

**A cyano cobalt “electron transfer bridge” boosting the two-electron reaction  
of a MnO<sub>2</sub> cathode with long lifespan in aqueous zinc batteries**

Yaozhi Liu,<sup>a,b</sup> Lu Lin,<sup>a</sup> Tengsheng Zhang,<sup>b</sup> Zhiqing Xue,<sup>a</sup> Jie Liu,<sup>d,e</sup> Dongliang Chao<sup>\*b</sup> and Xiaoqi Sun<sup>\*a,c</sup>

<sup>a</sup> Department of Chemistry, Northeastern University, 3-11 Wenhua Road, Shenyang, 110819, China.

<sup>b</sup> Laboratory of Advanced Materials, Shanghai Key Laboratory of Molecular Catalysis and Innovative Materials, and School of Chemistry and Materials, Fudan University, Shanghai 200433, China.

<sup>c</sup> National Frontiers Science Center for Industrial Intelligence and Systems Optimization, Northeastern University, 3-11 Wenhua Road, Shenyang, 110819, China.

<sup>d</sup> School of Resources and Civil Engineering, Northeastern University, 3-11 Wenhua Road, Shenyang, 110819, China.

<sup>e</sup> National-local Joint Engineering Research Center of High-efficient Exploitation Technology for Refractory Iron Ore Resources, Shenyang, 110819, China.

\* E-mail: chaod@fudan.edu.cn; sunxiaoqi@mail.neu.edu.cn

## Supplementary figures and tables

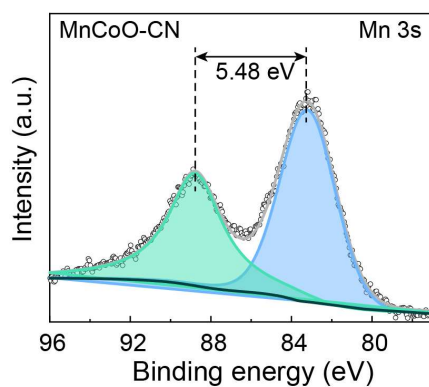

**Figure S1.** Mn 3s XPS of the MnCoO-CN material.

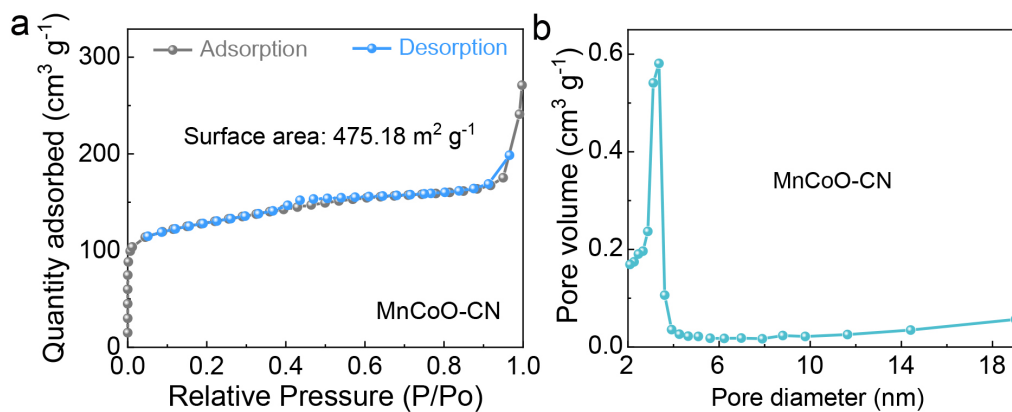

**Figure S2.** a) The N<sub>2</sub> adsorption-desorption isotherm and b) pore size distribution of the MnCoO-CN material.

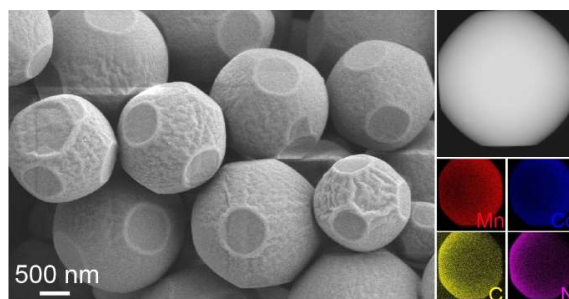

**Figure S3.** SEM image and STEM-EDS elemental mapping of the MnCo-PBA starting material.

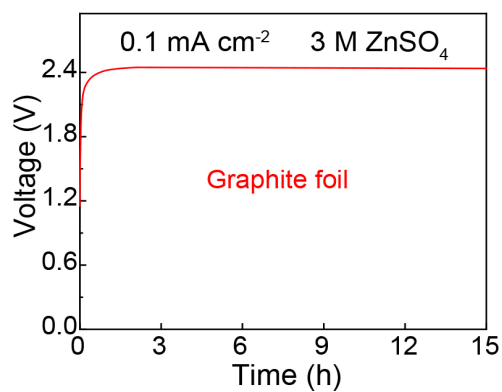

**Figure S4.** The oxidation process of the 3 M ZnSO<sub>4</sub> electrolyte with a graphite foil electrode.

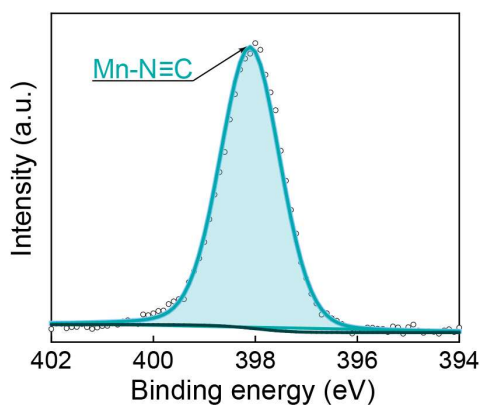

**Figure S5.** N 1s XPS of the MnCo-PBA starting material.

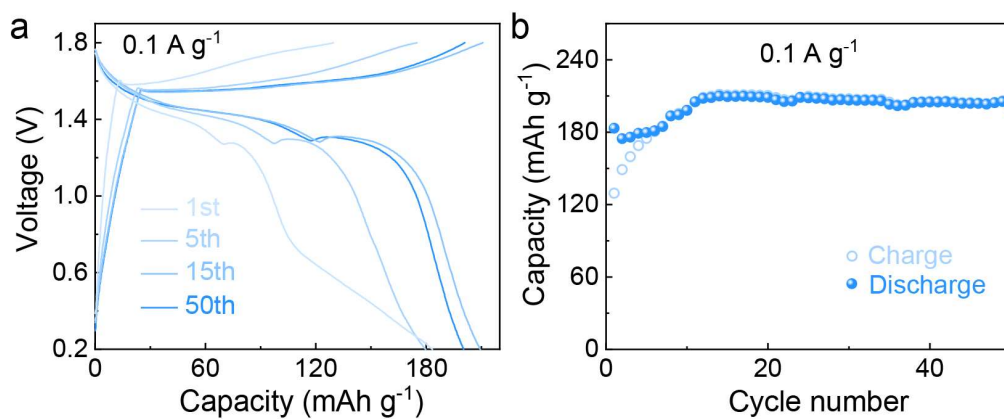

**Figure S6.** a) Charge-discharge curves and b) cycling performance of the MnCoO-CN cathode in 3 M ZnSO<sub>4</sub> at 0.1 A g<sup>-1</sup> with the top voltage cut-off of 1.8 V.

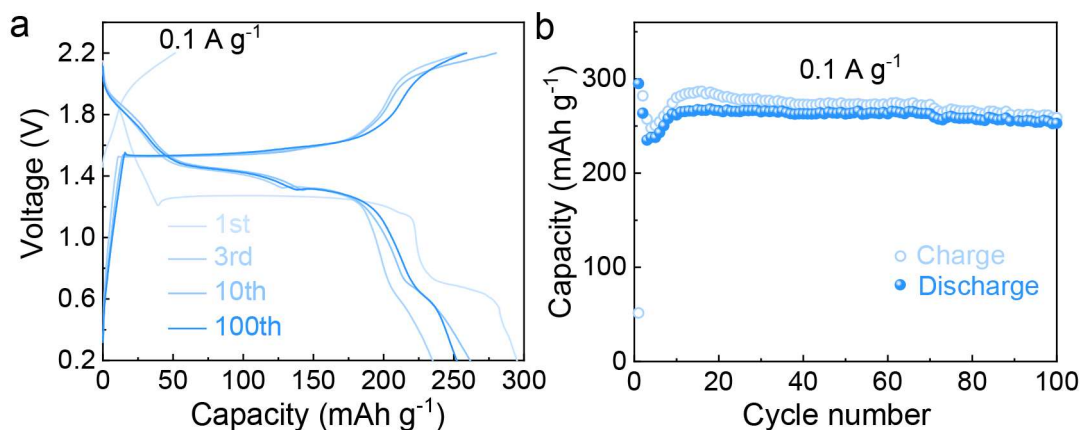

**Figure S7.** a) Charge-discharge curves and b) cycling performance of  $\alpha\text{-MnO}_2$  cathode in 3 M  $\text{ZnSO}_4$  at  $0.1 \text{ A g}^{-1}$ .

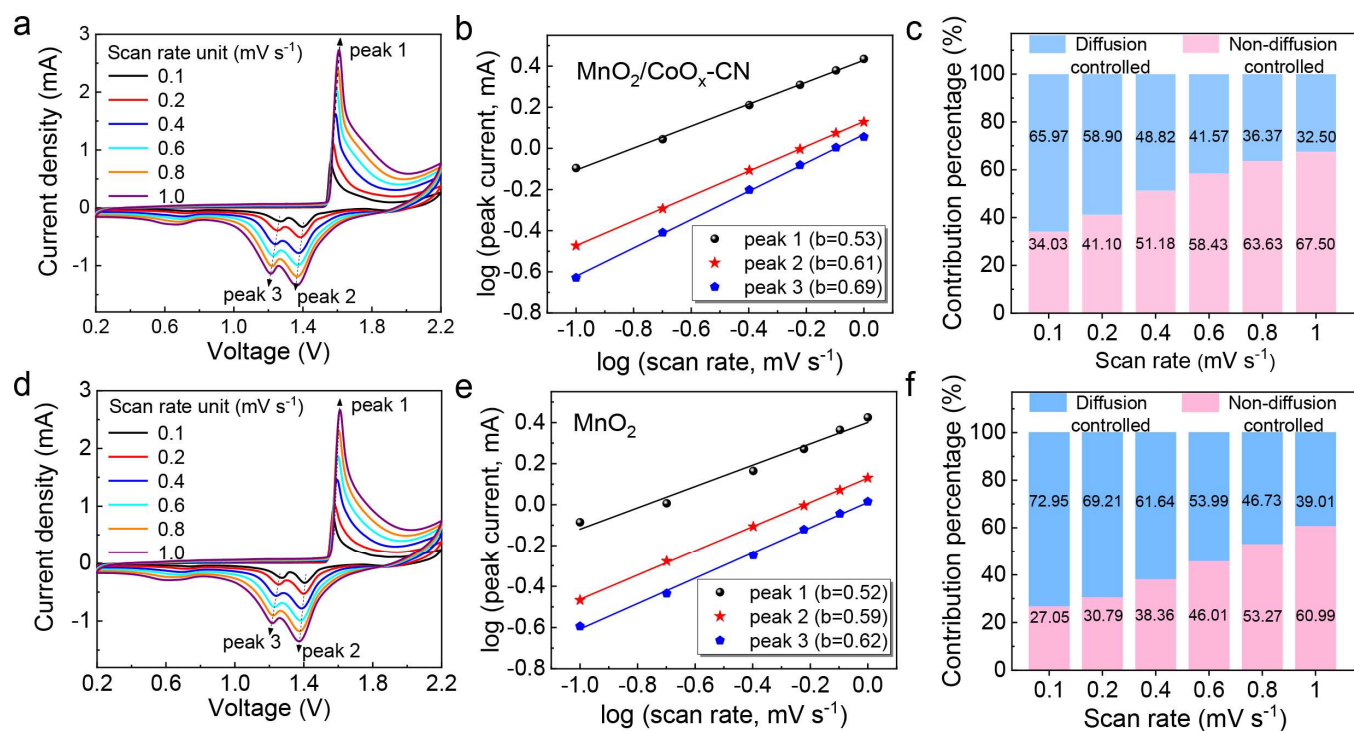

**Figure S8.** a,d) CV curves at different scan rates, b,e) the  $\log(i)$  vs.  $\log(v)$  plots of the three peaks and c,f) the non-diffusion and diffusion-controlled contributions at different scan rates of a-c)  $\text{MnO}_2/\text{CoO}_x\text{-CN}$  and d-f)  $\text{MnO}_2$ .

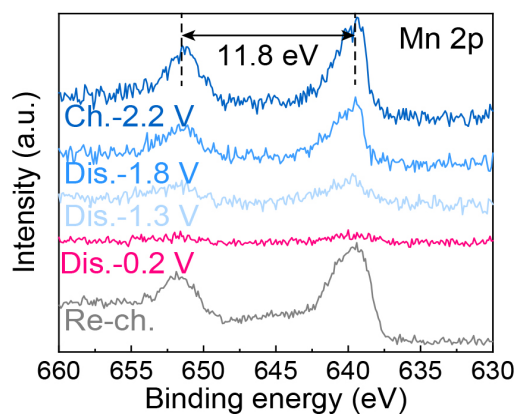

**Figure S9.** Mn 2p XPS of the MnO<sub>2</sub>/CoO<sub>x</sub>-CN cathode at different states.

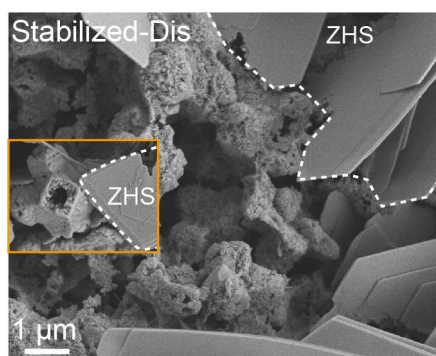

**Figure S10.** SEM image of the discharged MnO<sub>2</sub>/CoO<sub>x</sub>-CN cathode.

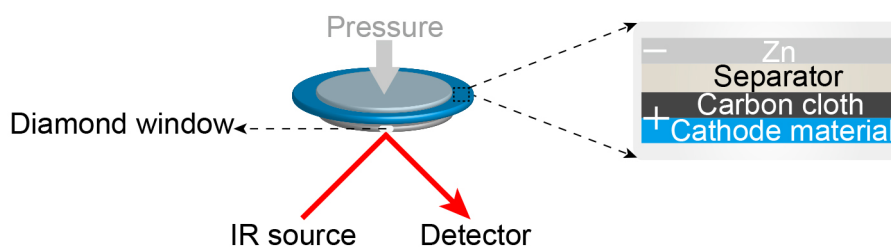

**Figure S11.** The in-situ ATR-FTIR setup.

**Table S1** The weight percentages of Mn and Co in the MnCoO-CN composite by ICP-OES.

| Element | wt%  |
|---------|------|
| Mn      | 50.9 |
| Co      | 1.8  |

Estimation of capacity based on MnO<sub>2</sub> mass according to the results in Table S1:

According to ICP analysis, 50.9 wt% weight in the MnCoO-CN composite material is from Mn element. When all Mn transforms to MnO<sub>2</sub> after conditioning, the weight portion of MnO<sub>2</sub> with respect to the initial overall weight is  $50.9 \text{ wt\%} \div M_{Mn} \times M_{MnO_2} = 50.9 \text{ wt\%} \div 54.94 \text{ g mol}^{-1} \times 86.94 \text{ g mol}^{-1} = 80.5\%$ . The cathode delivers 425 mAh g<sup>-1</sup> capacity after conditioning based on the initial composite mass, which corresponds to the capacity of  $425 \text{ mAh g}^{-1} \div 80.5\% = 527 \text{ mAh g}^{-1}$  based on the mass of MnO<sub>2</sub>.

**Table S2** Calculation of two-electron transfer contribution in MnO<sub>2</sub>.

| Cathode                                                                                                     | MnO <sub>2</sub> | MnO <sub>2</sub> /CoO <sub>x</sub> -CN |
|-------------------------------------------------------------------------------------------------------------|------------------|----------------------------------------|
| Mn concentration in electrolyte at the charged state (mM)                                                   | 36.1             | 57.3                                   |
| Mn concentration in electrolyte at the discharged state (mM)                                                | 95.7             | 183.6                                  |
| Two-electron transfer mass (mg)<br>= conc[diff] (mM) × 60 (μL) × 86.94 (g mol <sup>-1</sup> )               | 0.311            | 0.659                                  |
| Overall MnO <sub>2</sub> mass (mg)                                                                          | 1.25             | 0.822                                  |
| <b>Two-electron transfer %</b><br><b>= two-electron transfer mass ÷ overall MnO<sub>2</sub> mass × 100%</b> | <b>25%</b>       | <b>80%</b>                             |

Discussion of Table S2:

To measure the Mn concentrations in the electrolyte at different states, the electrolyte in cycled cells is extracted from separators. The Mn/Zn ratios are measured by ICP, and the Zn concentration of 3 M is used as a reference to calculate Mn concentrations. The fluctuation of Zn concentration during charge/discharge is only a minority of the overall Zn content in the 3 M ZnSO<sub>4</sub> electrolyte. To be more specific, 60 μL electrolyte in the cell contains 60 μL × 3 M = 0.18 mmol of Zn. The MnO<sub>2</sub>/CoO<sub>x</sub>-CN cathode reaches the highest capacity around 0.433 mAh. This is the same as the Zn deposition capacity at the anode, which corresponds to 0.433 mAh ÷ 820 mAh g<sup>-1</sup> ÷ 65.4 g mol<sup>-1</sup> = 0.008 mmol of Zn. The concentration change in the electrolyte is only 0.008/0.18 = 5%, assuming no Zn participation in the cathode reaction. This change is small, and the utilization of Zn concentration as the reference to calculate Mn concentration is thus feasible.

During the two electron reaction of MnO<sub>2</sub>, Mn<sup>2+</sup> is formed during discharge, and its dissolution in the electrolyte causes Mn concentration increase. Upon charge, Mn<sup>2+</sup> is oxidized and deposited back to the cathode as MnO<sub>2</sub>, and Mn concentration in the electrolyte decreases. Therefore, the Mn concentration difference between the charged and discharged states is the active material undergoing reversible two-electron transfer of MnO<sub>2</sub>/Mn<sup>2+</sup> based on the dissolution/deposition reaction. The corresponding mass of MnO<sub>2</sub> is calculated based on the following equation:

$$m_{two-electron} = (c_{dis.} - c_{ch.}) \times V_{electrolyte} \times M_{MnO_2} \quad \text{equation (1)}$$

The mass contribution of two-electron transfer in the total MnO<sub>2</sub> is calculated based on the following equation:

$$\omega_{two-electron} = \frac{m_{two-electron}}{m_{MnO_2}} \times 100\% \quad \text{equation (2)}$$

In the above equations,  $c_{dis.}$  and  $c_{ch.}$  represent the Mn concentrations in electrolyte at the discharged and charged states, respectively;  $V_{electrolyte}$  corresponds to the volume of electrolyte;  $M_{MnO_2}$  is the molecular weight of MnO<sub>2</sub>;  $m_{MnO_2}$  is the MnO<sub>2</sub> mass.

**Table S3** Capacity comparison of the MnO<sub>2</sub>/CoO<sub>x</sub>-CN cathode in the Mn<sup>2+</sup> free electrolyte of 3 M ZnSO<sub>4</sub> with previously reported manganese oxide cathodes using electrolytes containing pre-added Mn<sup>2+</sup> salts in aqueous zinc batteries.

| Cathode material                                                      | Electrolyte                                                                     | Current density/rate                           | Capacity                                           | Ref.      |
|-----------------------------------------------------------------------|---------------------------------------------------------------------------------|------------------------------------------------|----------------------------------------------------|-----------|
| Od-Mn <sub>3</sub> O <sub>4</sub>                                     | 2 M ZnSO <sub>4</sub> + 0.2 M MnSO <sub>4</sub>                                 | 0.2 A g <sup>-1</sup>                          | 396 mAh g <sup>-1</sup>                            | 1         |
| MO-ZMO                                                                | 2 M Zn(CF <sub>3</sub> SO <sub>3</sub> ) <sub>2</sub> + 0.1 M MnSO <sub>4</sub> | 0.1 A g <sup>-1</sup>                          | 247 mAh g <sup>-1</sup>                            | 2         |
| Mg <sub>0.9</sub> Mn <sub>3</sub> O <sub>7</sub> ·2.7H <sub>2</sub> O | 3 M ZnSO <sub>4</sub> + 0.1 M MnSO <sub>4</sub>                                 | 0.2 A g <sup>-1</sup>                          | 312 mAh g <sup>-1</sup>                            | 3         |
| BMO-6                                                                 | 2 M ZnSO <sub>4</sub> + 0.25 M MnSO <sub>4</sub>                                | 0.1 A g <sup>-1</sup>                          | 363 mAh g <sup>-1</sup>                            | 4         |
| Cu-MnO <sub>2</sub>                                                   | 2 M ZnSO <sub>4</sub> + 0.3 M MnSO <sub>4</sub>                                 | 0.1 A g <sup>-1</sup>                          | 443 mAh g <sup>-1</sup>                            | 5         |
| PODA/MnO <sub>2</sub>                                                 | 2 M ZnSO <sub>4</sub> + 0.1 M MnSO <sub>4</sub>                                 | 0.1 A g <sup>-1</sup>                          | 321 mAh g <sup>-1</sup>                            | 6         |
| MnO <sub>2</sub> /CoO <sub>x</sub> -CN                                | 3 M ZnSO <sub>4</sub>                                                           | 0.1 A g <sup>-1</sup><br>0.2 A g <sup>-1</sup> | 425 mAh g <sup>-1</sup><br>369 mAh g <sup>-1</sup> | This work |



**Table S4** Cycling performance comparison of the MnO<sub>2</sub>/CoO<sub>x</sub>-CN cathode in the Mn<sup>2+</sup> free electrolyte of 3 M ZnSO<sub>4</sub> with previously reported manganese oxide cathodes using electrolytes containing pre-added Mn<sup>2+</sup> salts in aqueous zinc batteries.

| Cathode material                                                      | Electrolyte                                             | Current density/rate                           | Cycling performance                                | Ref.      |
|-----------------------------------------------------------------------|---------------------------------------------------------|------------------------------------------------|----------------------------------------------------|-----------|
| Od-Mn <sub>3</sub> O <sub>4</sub>                                     | 2 M ZnSO <sub>4</sub> +<br>0.2 M MnSO <sub>4</sub>      | 5.0 A g <sup>-1</sup>                          | 95.7% after 12000 cycles                           | 1         |
| Mg <sub>0.9</sub> Mn <sub>3</sub> O <sub>7</sub> ·2.7H <sub>2</sub> O | 3 M ZnSO <sub>4</sub> +<br>0.1 M MnSO <sub>4</sub>      | 0.2 A g <sup>-1</sup><br>5.0 A g <sup>-1</sup> | 95% after 100 cycles<br>92% after 5000 cycles      | 3         |
| BMO-6                                                                 | 2 M ZnSO <sub>4</sub> +<br>0.25 M MnSO <sub>4</sub>     | 1.0 A g <sup>-1</sup>                          | 93% after 10000 cycles                             | 4         |
| PANI-MnO <sub>2</sub>                                                 | 2 M ZnSO <sub>4</sub> +<br>0.1 M MnSO <sub>4</sub>      | 0.2 A g <sup>-1</sup><br>2.0 A g <sup>-1</sup> | 89% after 200 cycles<br>83% after 5000 cycles      | 7         |
| α-MnO <sub>2</sub>                                                    | 2 M ZnSO <sub>4</sub> +<br>0.1 M MnSO <sub>4</sub>      | 5 C                                            | 92% after 5000 cycles                              | 8         |
| Ca <sub>0.28</sub> MnO <sub>2</sub>                                   | 1 M ZnSO <sub>4</sub> +<br>0.1 M MnSO <sub>4</sub>      | 3.5 A g <sup>-1</sup>                          | 92% after 5000 cycles                              | 9         |
| CNT@KMO@GC                                                            | 2 M ZnSO <sub>4</sub> +<br>0.2 M MnSO <sub>4</sub>      | 10.0 A g <sup>-1</sup>                         | 80% after 10000 cycles                             | 10        |
| MnO <sub>2</sub>                                                      | 2 M ZnSO <sub>4</sub> +<br>0.005 M<br>MnSO <sub>4</sub> | 10 mA cm <sup>-2</sup>                         | 100% after 16000 cycles                            | 11        |
| K-V <sub>2</sub> C@MnO <sub>2</sub>                                   | 2 M ZnSO <sub>4</sub> +<br>0.25 M MnSO <sub>4</sub>     | 0.3 A g <sup>-1</sup><br>2.0 A g <sup>-1</sup> | 87% after 180 cycles<br>82% after 5000 cycles      | 12        |
| MnO <sub>2</sub> /CoO <sub>x</sub> -CN                                | 3 M ZnSO <sub>4</sub>                                   | 0.2 A g <sup>-1</sup><br>2.0 A g <sup>-1</sup> | 81.6% after 300 cycles<br>83.1% after 25000 cycles | This work |

## References

- 1 Q. Tan, X. Li, B. Zhang, X. Chen, Y. Tian, H. Wan, L. Zhang, L. Miao, C. Wang, Y. Gan, J. Jiang, Y. Wang, H. Wang, *Adv. Energy Mater.* 2020, **10**, 2001050. DOI: [10.1002/aenm.202001050](https://doi.org/10.1002/aenm.202001050).
- 2 Y. Zeng, Y. Wang, Q. Jin, Z. Pei, D. Luan, X. Zhang, X. W. Lou, *Angew. Chem. Int. Ed.* 2021, **60**, 25793-25798. DOI: [10.1002/anie.202113487](https://doi.org/10.1002/anie.202113487).
- 3 J. Li, N. Luo, L. Kang, F. Zhao, Y. Jiao, T. J. Macdonald, M. Wang, I. P. Parkin, P. R. Shearing, D. J. L. Brett, G. Chai, G. He, *Adv. Energy Mater.* 2022, **12**, 2201840. DOI: [10.1002/aenm.202201840](https://doi.org/10.1002/aenm.202201840).
- 4 Y. Ma, M. Xu, R. Liu, H. Xiao, Y. Liu, X. Wang, Y. Huang, G. Yuan, *Energy Stor. Mater.* 2022, **48**, 212-222. DOI: [10.1016/j.ensm.2022.03.024](https://doi.org/10.1016/j.ensm.2022.03.024).
- 5 J. Zhang, W. Li, J. Wang, X. Pu, G. Zhang, S. Wang, N. Wang, X. Li, *Angew. Chem. Int. Ed.* 2023, **62**, e202215654. DOI: [10.1002/anie.202215654](https://doi.org/10.1002/anie.202215654).
- 6 Y. Zhao, R. Zhou, Z. Song, X. Zhang, T. Zhang, A. Zhou, F. Wu, R. Chen, L. Li, *Angew. Chem. Int. Ed.* 2022, **61**, e202212231. DOI: [10.1002/anie.202212231](https://doi.org/10.1002/anie.202212231).
- 7 J. Huang, Z. Wang, M. Hou, X. Dong, Y. Liu, Y. Wang, Y. Xia, *Nat. Commun.* 2018, **9**, 2906. DOI: [10.1038/s41467-018-04949-4](https://doi.org/10.1038/s41467-018-04949-4).
- 8 H. Pan, Y. Shao, P. Yan, Y. Cheng, K. Han, Z. Nie, C. Wang, J. Yang, X. Li, P. Bhattacharya, K. T. Mueller, J. Liu, *Nat. Energy* 2016, **5**, 16039. DOI: [10.1038/NENERGY.2016.39](https://doi.org/10.1038/NENERGY.2016.39).
- 9 T. Sun, Q. Nian, S. Zheng, J. Shi, Z. Tao, *Small* 2020, **16**, 200597. DOI: [10.1002/smll.202000597](https://doi.org/10.1002/smll.202000597).
- 10 G. Wang, Y. Wang, B. Guan, J. Liu, Y. Zhang, X. Shi, C. Tang, G. Li, Y. Li, X. Wang, L. Li, *Small* 2021, **17**, 2104557. DOI: [10.1002/smll.202104557](https://doi.org/10.1002/smll.202104557).
- 11 X. Shen, X. Wang, Y. Zhou, Y. Shi, L. Zhao, H. Jin, J. Di, Q. Li, *Adv. Funct. Mater.* 2021, **31**, 2101579. DOI: [10.1002/adfm.202101579](https://doi.org/10.1002/adfm.202101579).
- 12 X. Zhu, Z. Cao, W. Wang, H. Li, J. Dong, S. Gao, D. Xu, L. Li, J. Shen, M. Ye, *ACS Nano* 2021, **15**, 2971-2983. DOI: [10.1021/acsnano.0c09205](https://doi.org/10.1021/acsnano.0c09205).
